# Supplementary material
Source: publisher figshare collection journal article supplement (https://tandf.figshare.com/ndownloader/files/12890138)
Supplement: Supplementary file 1 [file 12890138]

**Supplementary Table 1. Details of actinobacteria isolated from chickpea rhizospheric soil**

| **Locality** | **State** | **Chickpea variety** | **Number of rhizospheric soil samples collected** | **Isolate code** | **Number ofactinobacteria obtained** |
| --- | --- | --- | --- | --- | --- |
| Ramapuram, Alampur, Chagapuram,  ICRISAT#, Patancheru field | Telangana | JG11, NBEG-3, Globi, BG-42, JAKI-9218, KAK-212 | 20 | ATIRS | 166 |
| Raichur, Dharwad | Karnataka | Annigeri, JG11 | 2 | AKIRS | 28 |
| TNAU* field | Tamil Nadu | Co3 | 1 | ATRS | 7 |
| Pune (Rural area) | Maharashtra | Vijay, Vishal | 5 | ARRS | 29 |
| Kanpur (Rural area) | Utter Pradesh | Pragathi, Avrodhi, Udai | 4 | AURS | 27 |

#ICRISAT = International Crops Research Institute for the Semi-Arid Tropics (ICRISAT); *TNAU = Tamil Nadu Agricultural University

**Supplementary Table 2**. Pearson correlation coefficient analysis between isolates PGP traits and selected chickpea growth responses

| **PGP traits/Plant growth responses** | **SPAD** | **Shoot dry weight** | **Root surface area** | **No flowers** | **No seeds** |
| --- | --- | --- | --- | --- | --- |
| **IAA** | -1.000* | -.511NS | .477NS | .543NS | .974NS |
| **Siderophore** | -.033NS | .856NS | .882NS | .844NS | .230NS |
| **P solubilization** | -.613NS | -.989NS | -.377NS | -.306NS | .445NS |
| **K solubilization** | .129NS | -.803NS | -.923NS | -.891NS | -.322NS |
| **Zn solubilization** | -.938NS | -.156NS | .769NS | .815NS | .988NS |
| **ACC deaminase** | -1.000** | -.500NS | .488NS | .553NS | .977NS |
| **HCN** | -.488NS | -1.000** | -.511NS | -.446NS | .305NS |

* Correlation is significant at *p* < 0.05; ** Correlation is significant at *p* < 0.01; NS – Non significant.

**Supplementary Table 3. Pearson correlation coefficient analysis between chickpea growth responses in control plants**

| **Plant growth traits** | **Shoot height** | **Shoot DW** | **No branches** | **Leaf area** | **Leaf DW** | **SPAD** | **Root length** | **Root**  **Surface area** | **Root volume** | **Root  DW** | **No flowers** | **No pods¶** | **No seeds** | **Seed weight** | **No pods"** | **Pod weight** | **Total biomass** |
| --- | --- | --- | --- | --- | --- | --- | --- | --- | --- | --- | --- | --- | --- | --- | --- | --- | --- |
| **Shoot height** | 1 |  |  |  |  |  |  |  |  |  |  |  |  |  |  |  |  |
| **Shoot DW** | .409 | 1 |  |  |  |  |  |  |  |  |  |  |  |  |  |  |  |
| **No branches** | -.580 | -.215 | 1 |  |  |  |  |  |  |  |  |  |  |  |  |  |  |
| **Leaf area** | .431 | .427 | .184 | 1 |  |  |  |  |  |  |  |  |  |  |  |  |  |
| **Leaf DW** | .076 | .603 | .168 | .652 | 1 |  |  |  |  |  |  |  |  |  |  |  |  |
| **SPAD** | .483 | -.264 | -.137 | -.267 | -.398 | 1 |  |  |  |  |  |  |  |  |  |  |  |
| **Root length** | .468 | -.083 | .374 | .501 | .129 | .620 | 1 |  |  |  |  |  |  |  |  |  |  |
| **Root surface area** | .634 | -.143 | .084 | .642 | .030 | .453 | .866* | 1 |  |  |  |  |  |  |  |  |  |
| **Root volume** | .666 | -.183 | -.096 | .613 | .076 | .421 | .762 | .964** | 1 |  |  |  |  |  |  |  |  |
| **Root DW** | .329 | -.616 | -.097 | .289 | -.247 | .321 | .491 | .776 | .857* | 1 |  |  |  |  |  |  |  |
| **No flowers** | .580 | .007 | -.214 | .702 | .453 | .122 | .519 | .743 | .870* | .708 | 1 |  |  |  |  |  |  |
| **No pods¶** | .635 | -.137 | .000 | .696 | .080 | .329 | .772 | .983** | .983** | .825* | .824* | 1 |  |  |  |  |  |
| **No seeds** | -.172 | -.816* | -.316 | -.398 | -.467 | .121 | -.213 | .037 | .216 | .649 | .225 | .117 | 1 |  |  |  |  |
| **Seed weight** | .010 | .343 | -.324 | .438 | .653 | -.712 | -.426 | -.167 | .013 | -.006 | .462 | .000 | .103 | 1 |  |  |  |
| **No pods"** | .039 | -.766 | -.245 | -.175 | -.684 | .150 | -.012 | .342 | .422 | .794 | .217 | .403 | .828* | -.106 | 1 |  |  |
| **Pod  weight** | -.071 | -.842* | .108 | -.474 | -.838* | .626 | .301 | .309 | .267 | .559 | -.127 | .235 | .575 | -.731 | .718 | 1 |  |
| **Total biomass** | .146 | .624 | -.520 | .240 | .295 | -.706 | -.652 | -.366 | -.281 | -.349 | -.002 | -.235 | -.199 | .726 | -.161 | -.720 | 1 |

* Correlation is significant at the 0.05 level (2-tailed); ** Correlation is significant at the 0.01 level (2-tailed); ¶ No pods at 45 DAS; " No pods at harvest.

**Supplementary Table 4. Pearson correlation coefficient analysis between chickpea growth responses towards ATIRS**43 treatment

| **Plant growth traits** | **Shoot height** | **Shoot DW** | **No branches** | **Leaf area** | **Leaf DW** | **SPAD** | **Root length** | **Root**  **Surface area** | **Root volume** | **Root  DW** | **No flowers** | **No pods¶** | **No seeds** | **Seed weight** | **No pods"** | **Pod weight** | **Total biomass** |
| --- | --- | --- | --- | --- | --- | --- | --- | --- | --- | --- | --- | --- | --- | --- | --- | --- | --- |
| **Shoot height** | 1 |  |  |  |  |  |  |  |  |  |  |  |  |  |  |  |  |
| **Shoot DW** | .244 | 1 |  |  |  |  |  |  |  |  |  |  |  |  |  |  |  |
| **No branches** | .711 | .710 | 1 |  |  |  |  |  |  |  |  |  |  |  |  |  |  |
| **Leaf area** | .348 | .922** | .657 | 1 |  |  |  |  |  |  |  |  |  |  |  |  |  |
| **Leaf DW** | .299 | .925** | .857* | .825* | 1 |  |  |  |  |  |  |  |  |  |  |  |  |
| **SPAD** | .711 | .278 | .812* | .133 | .488 | 1 |  |  |  |  |  |  |  |  |  |  |  |
| **Root length** | -.241 | .470 | .125 | .124 | .352 | .165 | 1 |  |  |  |  |  |  |  |  |  |  |
| **Root surface area** | -.054 | .695 | .470 | .367 | .677 | .379 | .912* | 1 |  |  |  |  |  |  |  |  |  |
| **Root volume** | .164 | .788 | .748 | .544 | .886* | .539 | .632 | .894* | 1 |  |  |  |  |  |  |  |  |
| **Root DW** | .219 | .808 | .832* | .708 | .968** | .497 | .245 | .606 | .870* | 1 |  |  |  |  |  |  |  |
| **No flowers** | -.179 | -.659 | -.318 | -.675 | -.457 | -.095 | -.286 | -.274 | -.185 | -.286 | 1 |  |  |  |  |  |  |
| **No pods¶** | .560 | .311 | .479 | .346 | .330 | .261 | -.002 | .208 | .409 | .282 | .297 | 1 |  |  |  |  |  |
| **No seeds** | -.383 | .044 | -.023 | -.340 | .099 | .282 | .813* | .708 | .454 | .119 | .043 | -.300 | 1 |  |  |  |  |
| **Seed weight** | -.882* | .119 | -.504 | -.012 | -.016 | -.698 | .470 | .345 | .136 | -.009 | .060 | -.205 | .350 | 1 |  |  |  |
| **No pods"** | -.500 | -.182 | -.171 | -.535 | -.059 | .148 | .636 | .550 | .357 | .031 | .411 | -.189 | .922** | .430 | 1 |  |  |
| **Pod  weight** | -.337 | -.223 | -.089 | -.575 | -.077 | .294 | .601 | .526 | .352 | .008 | .444 | -.114 | .910* | .258 | .981** | 1 |  |
| **Total biomass** | -.054 | -.743 | -.400 | -.535 | -.588 | -.293 | -.768 | -.753 | -.572 | -.429 | .817* | .174 | -.479 | -.148 | -.128 | -.101 | 1 |

* Correlation is significant at the 0.05 level (2-tailed); ** Correlation is significant at the 0.01 level (2-tailed); ¶ No pods at 45 DAS; " No pods at harvest.

**Supplementary Table 5. Pearson correlation coefficient analysis between chickpea growth responses towards ATIRS65 treatment**

| **Plant growth traits** | **Shoot height** | **Shoot DW** | **No branches** | **Leaf area** | **Leaf DW** | **SPAD** | **Root length** | **Root**  **Surface area** | **Root volume** | **Root  DW** | **No flowers** | **No pods¶** | **No seeds** | **Seed weight** | **No pods"** | **Pod weight** | **Total biomass** |
| --- | --- | --- | --- | --- | --- | --- | --- | --- | --- | --- | --- | --- | --- | --- | --- | --- | --- |
| **Shoot height** | 1 |  |  |  |  |  |  |  |  |  |  |  |  |  |  |  |  |
| **Shoot DW** | .723 | 1 |  |  |  |  |  |  |  |  |  |  |  |  |  |  |  |
| **No branches** | .807 | .736 | 1 |  |  |  |  |  |  |  |  |  |  |  |  |  |  |
| **Leaf area** | .239 | .442 | .122 | 1 |  |  |  |  |  |  |  |  |  |  |  |  |  |
| **Leaf DW** | -.004 | .430 | -.045 | .923** | 1 |  |  |  |  |  |  |  |  |  |  |  |  |
| **SPAD** | .458 | .076 | .113 | .681 | .392 | 1 |  |  |  |  |  |  |  |  |  |  |  |
| **Root length** | .619 | .403 | .194 | .614 | .360 | .761 | 1 |  |  |  |  |  |  |  |  |  |  |
| **Root surface area** | .609 | .507 | .212 | .764 | .556 | .783 | .970** | 1 |  |  |  |  |  |  |  |  |  |
| **Root volume** | .533 | .613 | .228 | .901* | .788 | .725 | .802 | .924** | 1 |  |  |  |  |  |  |  |  |
| **Root DW** | .563 | .585 | .155 | .761 | .632 | .664 | .912* | .973** | .946** | 1 |  |  |  |  |  |  |  |
| **No flowers** | -.261 | -.364 | .209 | -.372 | -.370 | -.259 | -.726 | -.724 | -.622 | -.818* | 1 |  |  |  |  |  |  |
| **No pods¶** | .481 | .525 | .117 | .857* | .722 | .726 | .897* | .973** | .969** | .983** | -.745 | 1 |  |  |  |  |  |
| **No seeds** | -.708 | -.843* | -.516 | -.083 | -.090 | .076 | -.421 | -.444 | -.427 | -.553 | .603 | -.414 | 1 |  |  |  |  |
| **Seed weight** | -.421 | -.811 | -.497 | -.388 | -.527 | .057 | .002 | -.196 | -.486 | -.337 | .124 | -.300 | .613 | 1 |  |  |  |
| **No pods"** | -.920** | -.635 | -.520 | -.318 | -.103 | -.567 | -.771 | -.767 | -.674 | -.757 | -.558 | -.663 | .739 | .370 | 1 |  |  |
| **Pod  weight** | -.493 | -.248 | -.030 | .122 | .196 | -.172 | -.558 | -.478 | -.295 | -.538 | .768 | -.390 | .682 | .039 | .733 | 1 |  |
| **Total biomass** | -.373 | -.492 | -.584 | -.659 | -.478 | -.401 | -.442 | -.483 | -.491 | -.381 | -.045 | -.474 | .059 | .166 | .173 | -.396 | 1 |

* Correlation is significant at the 0.05 level (2-tailed); ** Correlation is significant at the 0.01 level (2-tailed); ¶ No pods at 45 DAS; " No pods at harvest.

**Supplementary Table 6. Pearson correlation coefficient analysis between chickpea growth responses towards ARRS10 treatment**

| **Plant growth traits** | **Shoot height** | **Shoot DW** | **No branches** | **Leaf area** | **Leaf DW** | **SPAD** | **Root length** | **Root**  **Surface area** | **Root volume** | **Root  DW** | **No flowers** | **No pods¶** | **No seeds** | **Seed weight** | **No pods"** | **Pod weight** | **Total biomass** |
| --- | --- | --- | --- | --- | --- | --- | --- | --- | --- | --- | --- | --- | --- | --- | --- | --- | --- |
| **Shoot height** | 1 |  |  |  |  |  |  |  |  |  |  |  |  |  |  |  |  |
| **Shoot DW** | .125 | 1 |  |  |  |  |  |  |  |  |  |  |  |  |  |  |  |
| **No branches** | .744 | .540 | 1 |  |  |  |  |  |  |  |  |  |  |  |  |  |  |
| **Leaf area** | .323 | -.036 | .399 | 1 |  |  |  |  |  |  |  |  |  |  |  |  |  |
| **Leaf DW** | .258 | .675 | .407 | .571 | 1 |  |  |  |  |  |  |  |  |  |  |  |  |
| **SPAD** | .159 | .719 | .283 | -.639 | .125 | 1 |  |  |  |  |  |  |  |  |  |  |  |
| **Root length** | .370 | -.481 | .097 | .409 | -.095 | -.603 | 1 |  |  |  |  |  |  |  |  |  |  |
| **Root surface area** | .344 | -.388 | .170 | .685 | .150 | -.729 | .940** | 1 |  |  |  |  |  |  |  |  |  |
| **Root volume** | .229 | -.147 | .252 | .947** | .493 | -.744 | .623 | .852* | 1 |  |  |  |  |  |  |  |  |
| **Root DW** | .794 | -.143 | .464 | .491 | .246 | -.270 | .830* | .807 | .582 | 1 |  |  |  |  |  |  |  |
| **No flowers** | .015 | .786 | .148 | -.452 | .411 | .801 | -.292 | -.373 | -.406 | -.074 | 1 |  |  |  |  |  |  |
| **No pods¶** | -.207 | -.204 | -.050 | -.572 | -.777 | .255 | -.421 | -.577 | -.677 | -.548 | -.253 | 1 |  |  |  |  |  |
| **No seeds** | -.696 | -.151 | -.568 | .369 | .280 | -.583 | .013 | .216 | .471 | -.295 | -.190 | -.453 | 1 |  |  |  |  |
| **Seed weight** | -.870* | .045 | -.568 | -.506 | -.302 | .060 | -.184 | -.264 | -.328 | -.609 | .296 | .194 | .455 | 1 |  |  |  |
| **No pods"** | -.696 | -.151 | -.568 | .369 | .280 | -.583 | .013 | .216 | .471 | -.295 | -.190 | -453 | 1.000** | .455 | 1 |  |  |
| **Pod  weight** | -.317 | .258 | -.258 | .408 | .695 | -.149 | -.381 | -.111 | .326 | -.275 | .063 | -.559 | .720 | -.016 | .720 | 1 |  |
| **Total biomass** | -.557 | -.044 | -.175 | .463 | .183 | -.603 | .269 | .444 | .603 | -.112 | -.192 | -.316 | .793 | .525 | .793 | .303 | 1 |

* Correlation is significant at the 0.05 level (2-tailed); ** Correlation is significant at the 0.01 level (2-tailed); ¶ No pods at 45 DAS; " No pods at harvest.

**Supplementary Table 7. Pearson correlation coefficient analysis between chickpea growth responses towards consortium treatment**

| **Plant growth traits** | **Shoot height** | **Shoot DW** | **No branches** | **Leaf area** | **Leaf DW** | **SPAD** | **Root length** | **Root**  **Surface area** | **Root volume** | **Root  DW** | **No flowers** | **No pods¶** | **No seeds** | **Seed weight** | **No pods"** | **Pod weight** | **Total biomass** |
| --- | --- | --- | --- | --- | --- | --- | --- | --- | --- | --- | --- | --- | --- | --- | --- | --- | --- |
| **Shoot height** | 1 |  |  |  |  |  |  |  |  |  |  |  |  |  |  |  |  |
| **Shoot DW** | .734 | 1 |  |  |  |  |  |  |  |  |  |  |  |  |  |  |  |
| **No branches** | .846* | .700 | 1 |  |  |  |  |  |  |  |  |  |  |  |  |  |  |
| **Leaf area** | .619 | .880* | .641 | 1 |  |  |  |  |  |  |  |  |  |  |  |  |  |
| **Leaf DW** | .591 | .928** | .586 | .983** | 1 |  |  |  |  |  |  |  |  |  |  |  |  |
| **SPAD** | -.224 | -.628 | -.068 | -.758 | -.777 | 1 |  |  |  |  |  |  |  |  |  |  |  |
| **Root length** | -.193 | -.519 | -.227 | -.514 | -.510 | .726 | 1 |  |  |  |  |  |  |  |  |  |  |
| **Root surface area** | .096 | -.280 | .062 | -.047 | -.124 | .370 | .799 | 1 |  |  |  |  |  |  |  |  |  |
| **Root volume** | .385 | .161 | .371 | .542 | .410 | -.268 | .111 | .686 | 1 |  |  |  |  |  |  |  |  |
| **Root DW** | -.697 | -.196 | -.732 | -.190 | -.068 | -.163 | .196 | -.069 | -.346 | 1 |  |  |  |  |  |  |  |
| **No flowers** | -.186 | .363 | .041 | .649 | .634 | -.689 | -.476 | -.140 | .349 | .344 | 1 |  |  |  |  |  |  |
| **No pods¶** | .697 | .508 | .937** | .508 | .414 | .002 | -.338 | -.038 | .342 | -.842* | .055 | 1 |  |  |  |  |  |
| **No seeds** | -.471 | -.730 | -.762 | -.860* | -.817* | .419 | .385 | -.008 | -.477 | .269 | -.666 | -.709 | 1 |  |  |  |  |
| **Seed weight** | -.333 | -.235 | -.562 | -.413 | -.279 | .249 | .638 | .241 | -.372 | .724 | -.306 | -.784 | .543 | 1 |  |  |  |
| **No pods"** | -.213 | -.615 | -.493 | -.846 | -.808 | .584 | .438 | .019 | -.501 | .010 | -.885* | -.463 | .935** | .478 | 1 |  |  |
| **Pod  weight** | -.279 | -.686 | -.548 | -.874* | -.847* | .586 | .452 | .054 | -.460 | .030 | -.851* | -.497 | .956** | .461 | .995** | 1 |  |
| **Total biomass** | -.245 | -.420 | -.577 | -.539 | -.518 | -.024 | -.212 | -.427 | -.448 | .018 | -.466 | -.453 | .803 | .101 | .729 | .742 | 1 |

* Correlation is significant at the 0.05 level (2-tailed); ** Correlation is significant at the 0.01 level (2-tailed); ¶ No pods at 45 DAS; " No pods at harvest.

**Supplementary Table 8. Analysis of variance (ANOVA) on growth responses of different chickpea genotypes towards co-inoculation of actinobacteria and *M. ciceri* under glasshouse conditions**

| **Source of variation** | **Df** | **Mean square** | | | |
| --- | --- | --- | --- | --- | --- |
|  |  | **Shoot dry weight** | **Root dry weight** | **Nodule dry weight** | **Nitrogenase activity** |
| **Genotypes** | 4 | 0.08566*** | 0.015228NS | 0.0012069NS | 1.0208* |
| **Treatments** | 4 | 0.10938*** | 0.041059*** | 0.0096661*** | 3.4153*** |
| **Genotype × Treatment** | 16 | 0.011169** | 0.005534NS | 0.00016119* | 0.25245*** |

* Significant at *p* < 0.05; ** Significant at *p* < 0.01; *** Significant at *p* < 0.001; NS – Non significant.

**Supplementary Table 9. Phenolic profiling of MR chickpea genotype ICCV05530 towards *B. cinerea* challenge and consortium treatment**

| **Phenolics (µg. g-1 FW)** | **Control** | ***B. cinerea* challenged** | **Consortium treated** |
| --- | --- | --- | --- |
| Chlorogenic acid | - | - | 10647 |
| Sinapic acid | - | - | 6551 |
| Phloretic acid | 18964 | 66867 | 128332 |
| Ferulic acid | - | - | 2324 |
| Quercetin | - | 30860 | 5814 |
| Cinnamic acid | - | 930 | - |
| Formononetin | - | 10912 | 1925 |
| Kaempferol | - | 5189 | 612 |
| 3, 4-dihydroxy flavonone | 785 | - | - |

**Supplementary Figure 1.** Antibiosis of selected actinobacteria on mycelial growth of *B. cinerea*

**
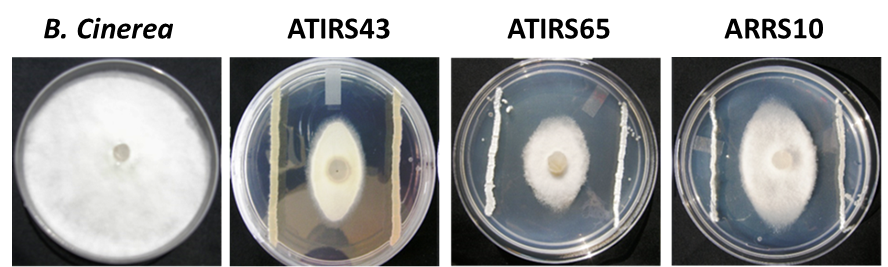
**

**Supplementary Figure 2. Phylogenetic relationships of the selected actinobacteria based on 16S rDNA gene sequences**

The numbers are the estimated confidence levels, expressed as percentages, for the positions of the branches, determined by bootstrap analysis. The scale bar indicates the evolutionary distance value between the sequences.

**Supplementary Figure 3.** Principal component analysis on selected chickpea growth responses towards actinobacterial treatment

**Supplementary Figure 4. Time course changes in lipid peroxidation**


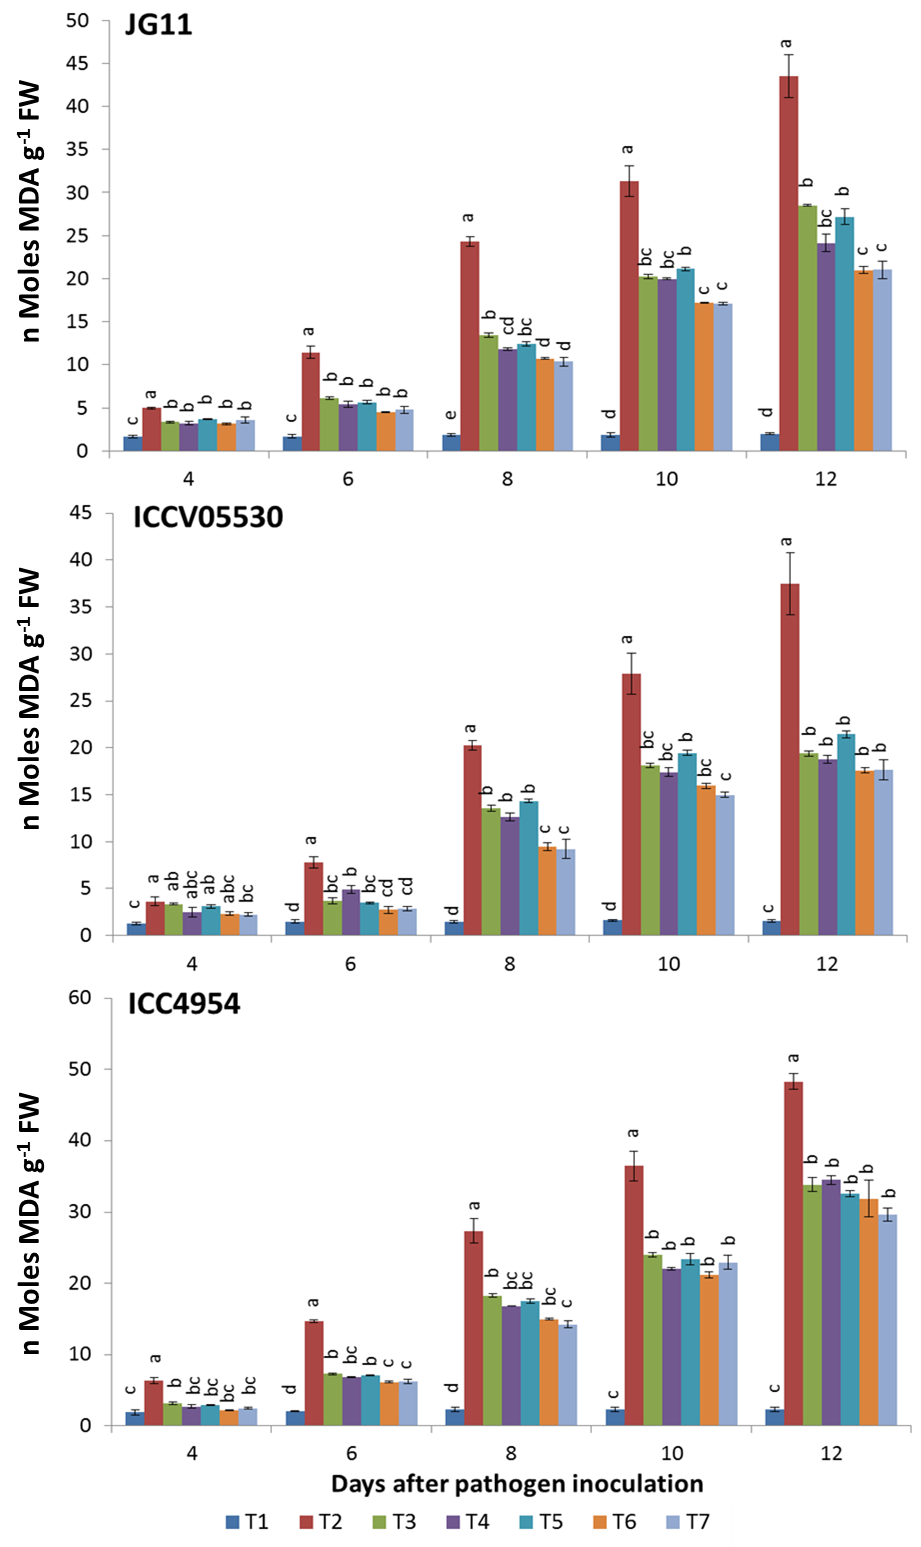


Each bar indicates mean (n=3). Error bar indicates SE. Lower case letters above the bars indicate significant differences among the treatments at specified DAPI as per Tukey’s test (*p*≤0.05).

**Supplementary Figure 5. Time course changes in SOD activity**

**
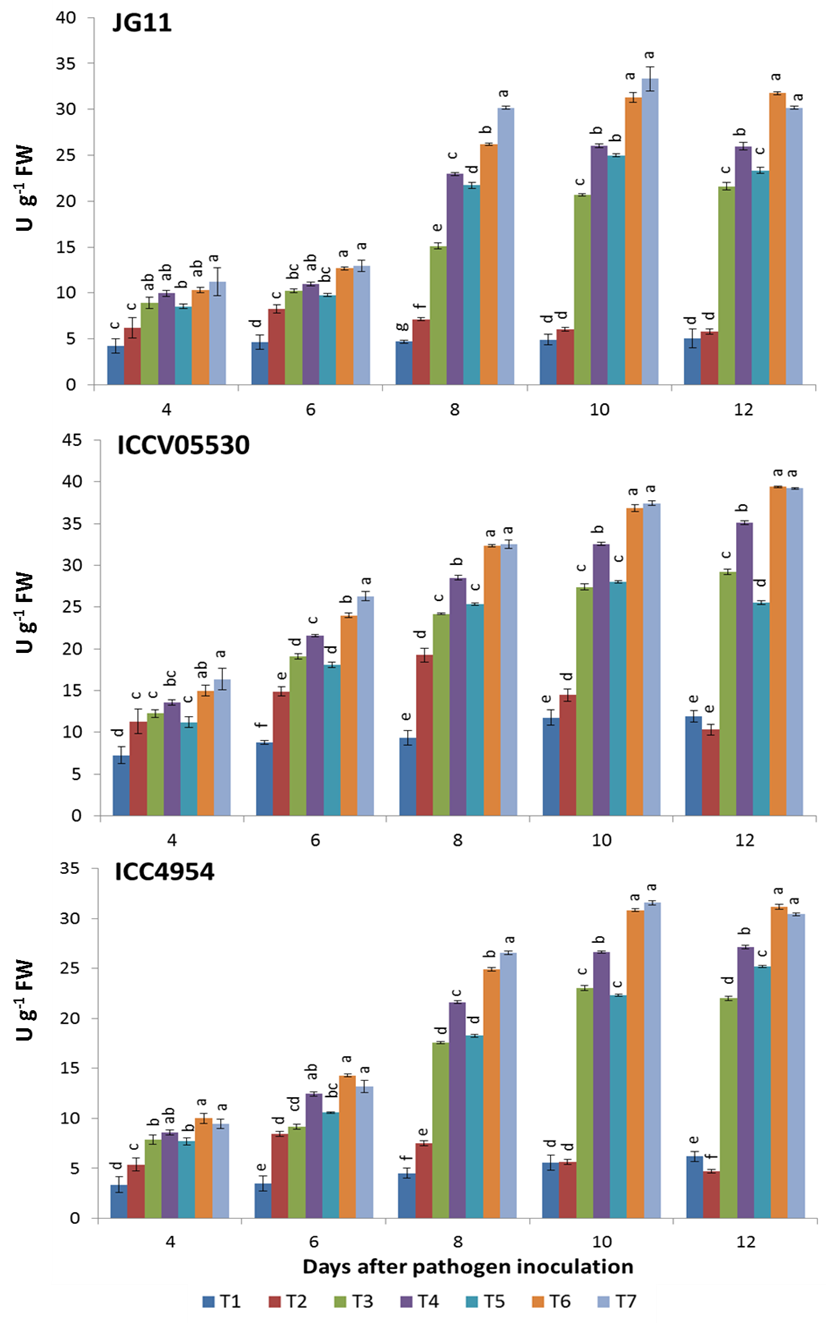
**

Each bar indicates mean (n=3). Error bar indicates SE. Lower case letters above the bars indicate significant differences among the treatments at specified DAPI as per Tukey’s test (*p*≤0.05).

**Supplementary Figure 6. Time course changes in CAT activity**


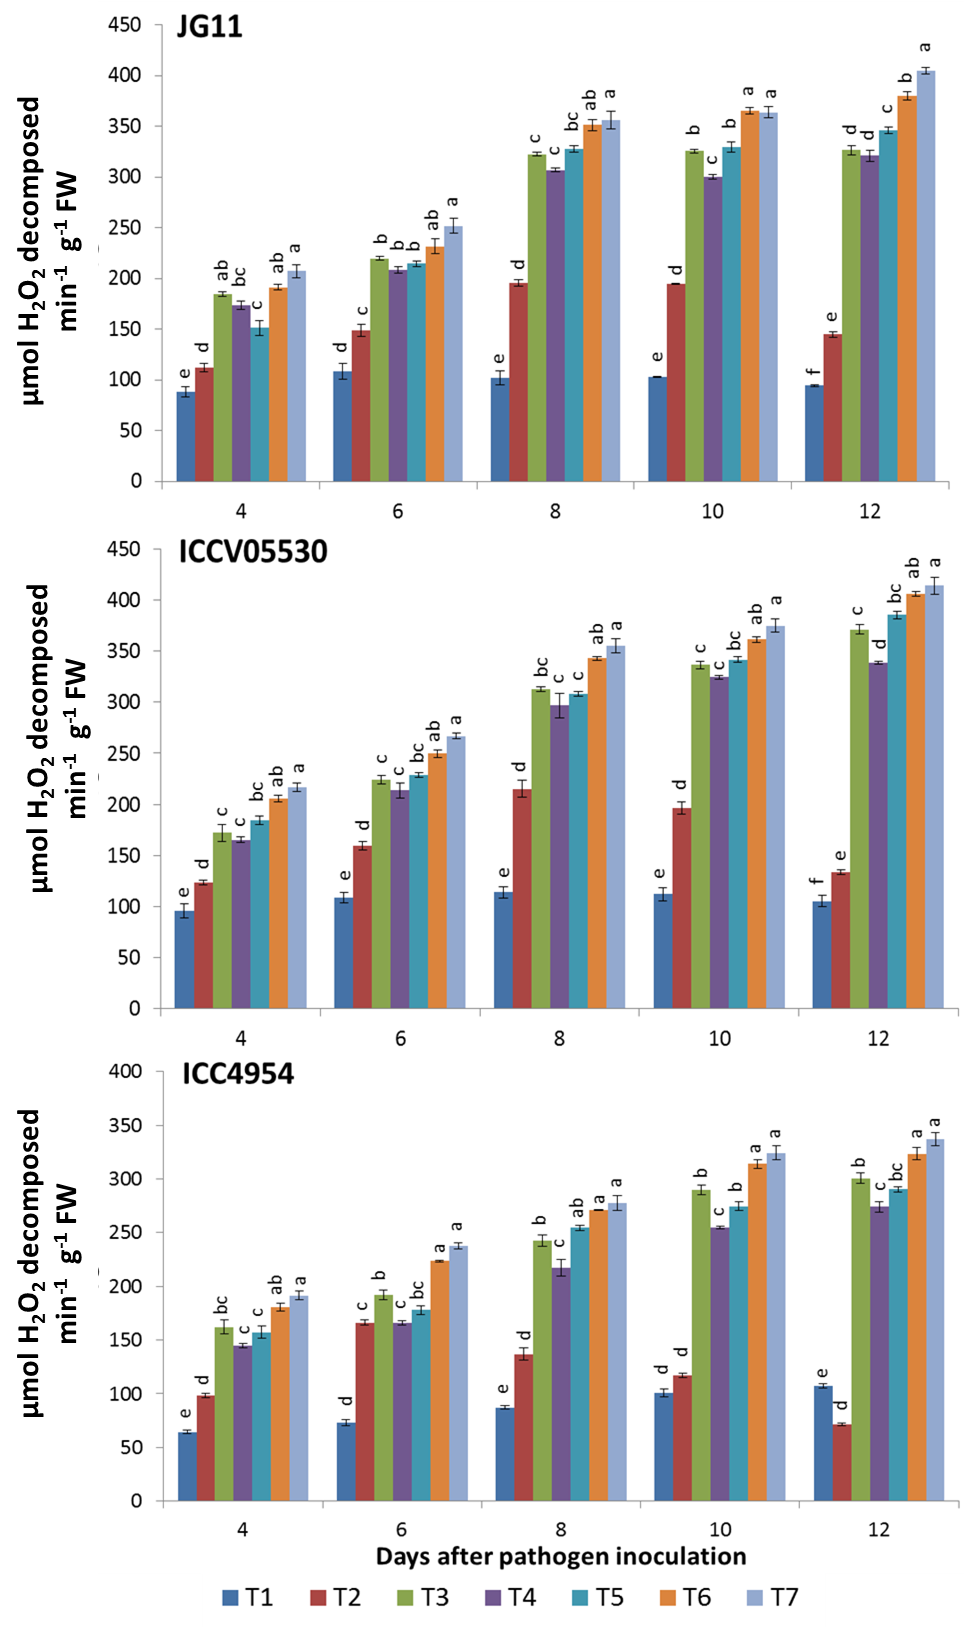


Each bar indicates mean (n=3). Error bar indicates SE. Lower case letters above the bars indicate significant differences among the treatments at specified DAPI as per Tukey’s test (*p*≤0.05).

**Supplementary Figure 7. Time course changes in APX activity**

**
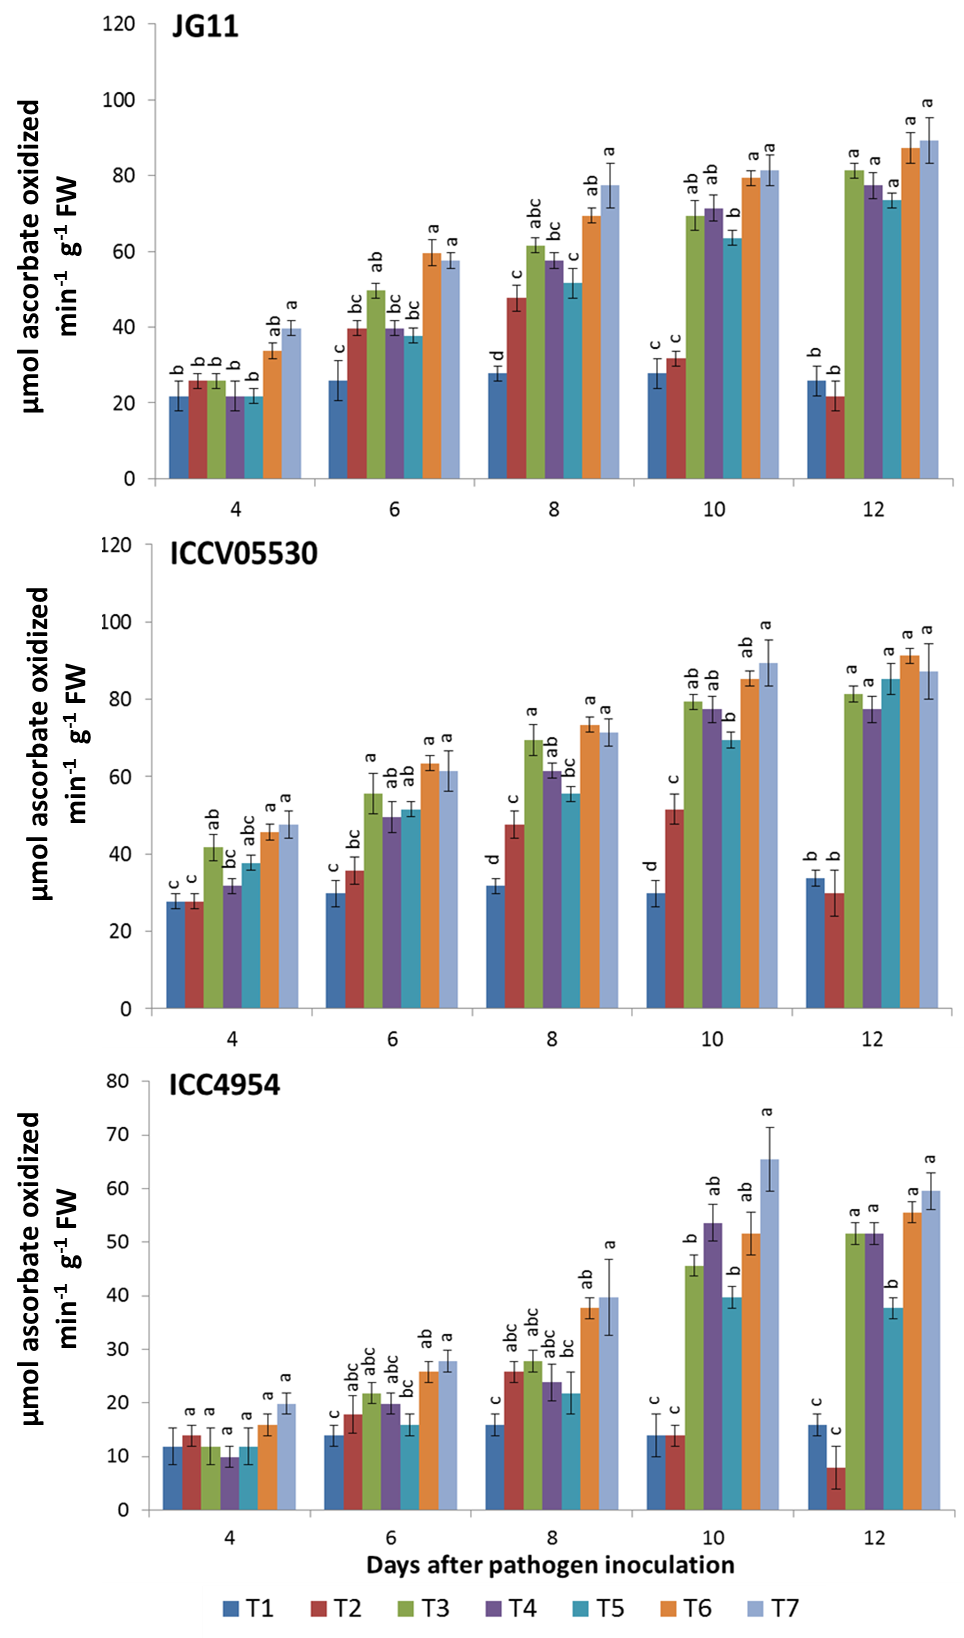
**

Each bar indicates mean (n=3). Error bar indicates SE. Lower case letters above the bars indicate significant differences among the treatments at specified DAPI as per Tukey’s test (*p*≤0.05).

**Supplementary Figure 8. Time course changes in GPX activity**

**
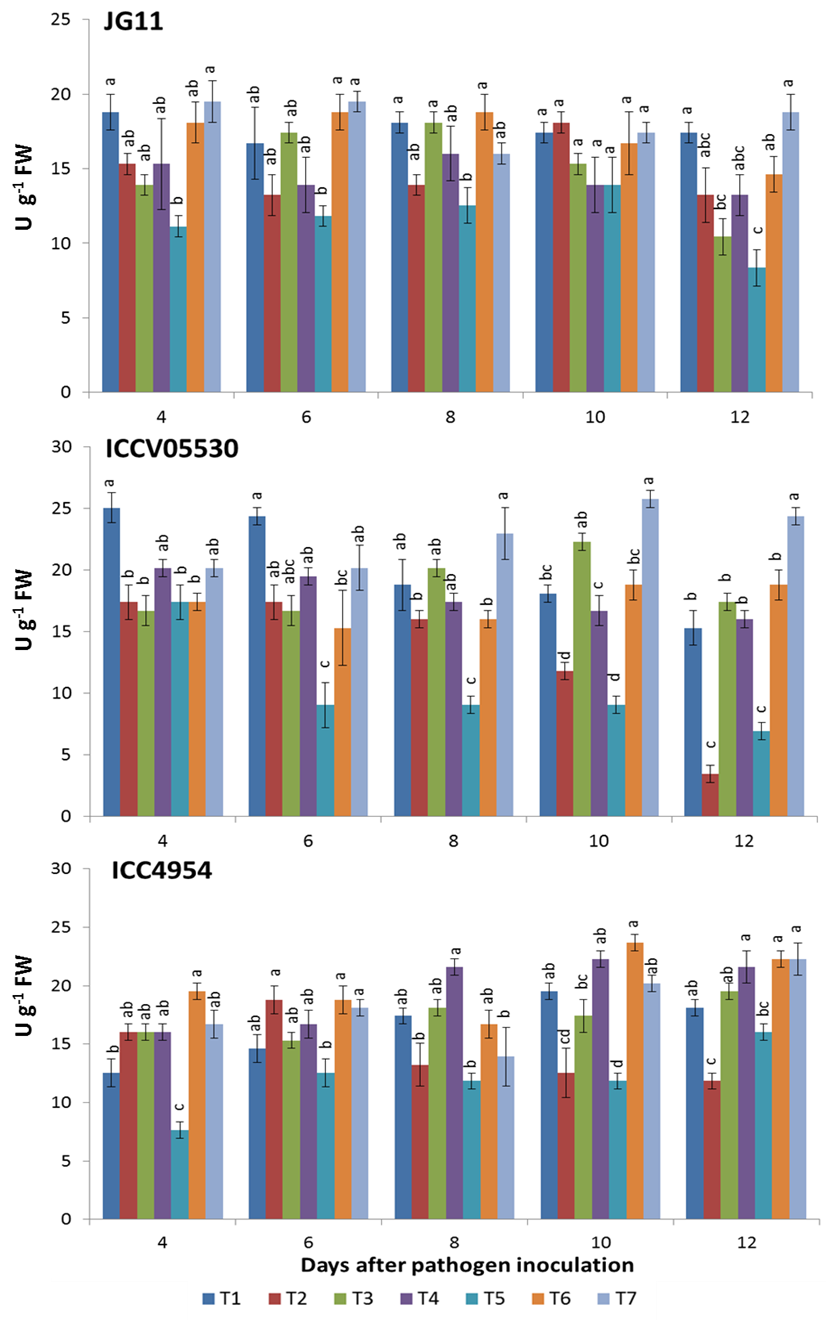
**

Each bar indicates mean (n=3). Error bar indicates SE. Lower case letters above the bars indicate significant differences among the treatments at specified DAPI as per Tukey’s test (*p*≤0.05).

**Supplementary Figure 9. Time course changes in GR activity**

**
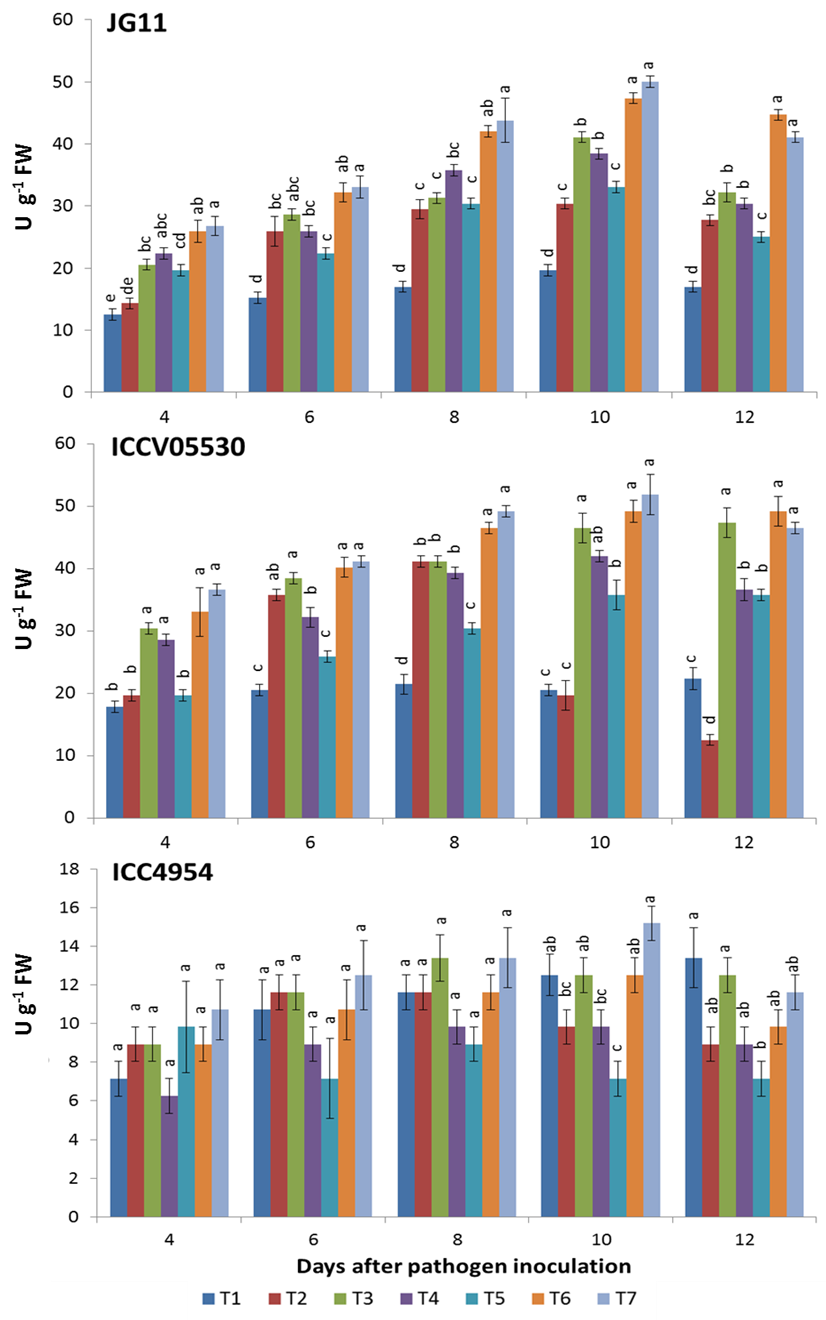
**

Each bar indicates mean (n=3). Error bar indicates SE. Lower case letters above the bars indicate significant differences among the treatments at specified DAPI as per Tukey’s test (*p*≤0.05).

**Supplementary Figure 10. Time course changes in PAL activity**


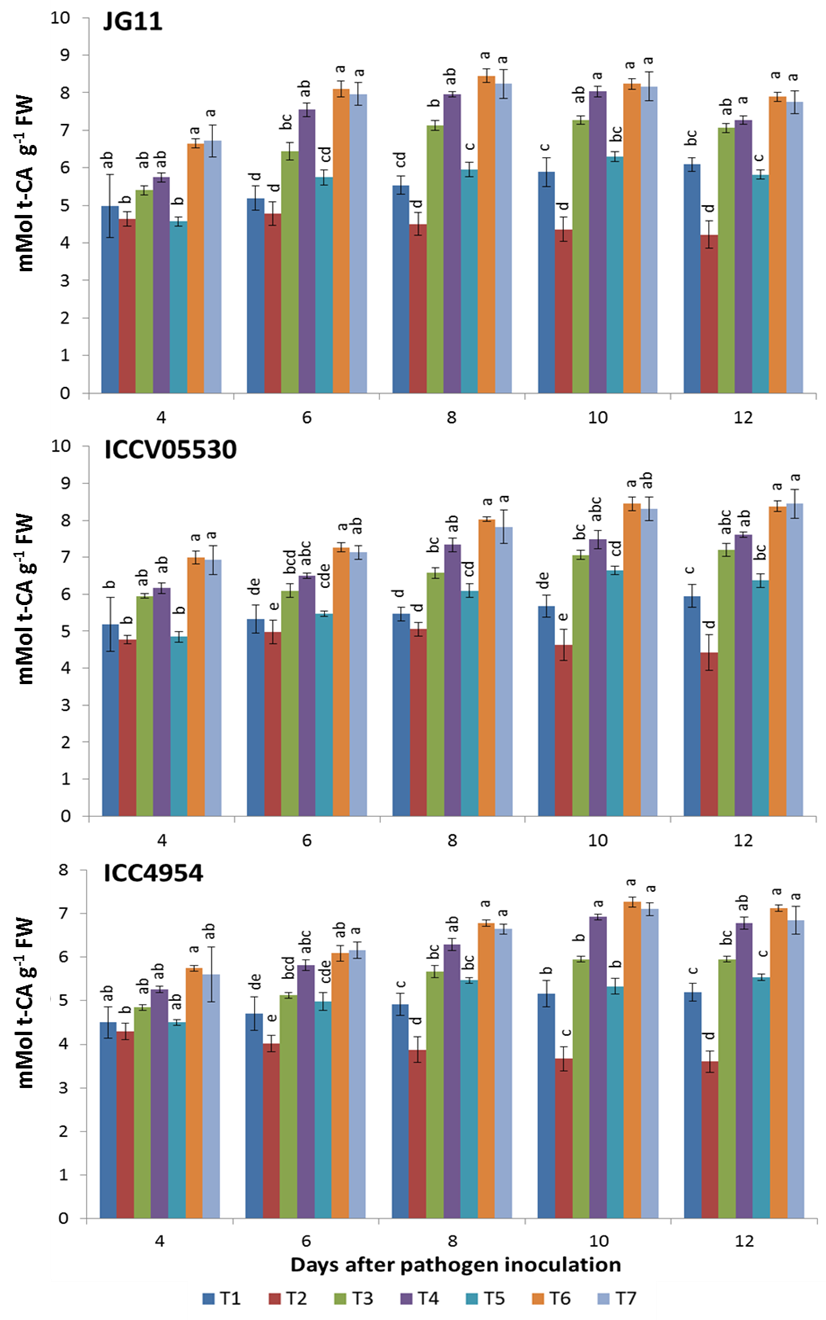


Each bar indicates mean (n=3). Error bar indicates SE. Lower case letters above the bars indicate significant differences among the treatments at specified DAPI as per Tukey’s test (*p*≤0.05).

**Supplementary Figure 11. Time course changes in PPO activity**


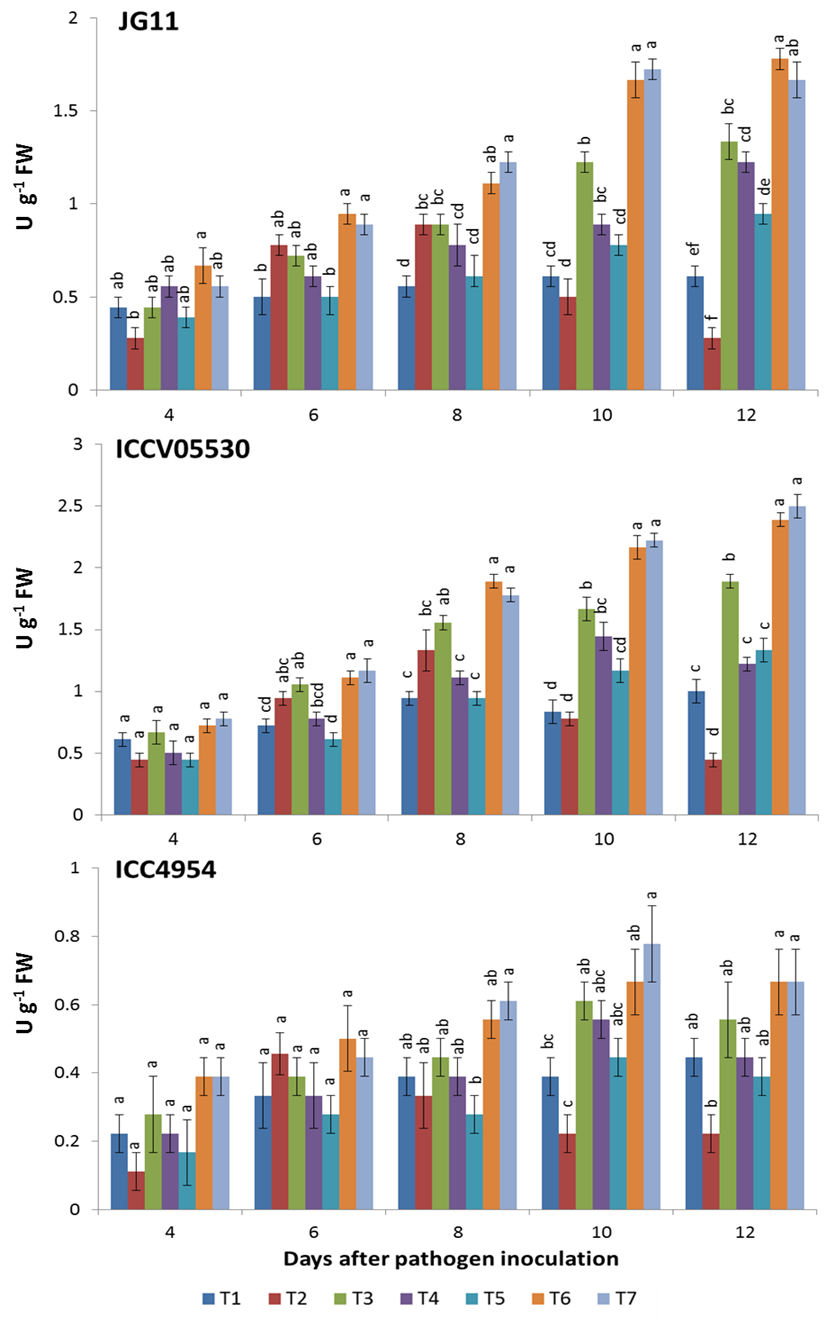


Each bar indicates mean (n=3). Error bar indicates SE. Lower case letters above the bars indicate significant differences among the treatments at specified DAPI as per Tukey’s test (*p*≤0.05).

**Supplementary Figure 12. Time course changes in TPC**

**
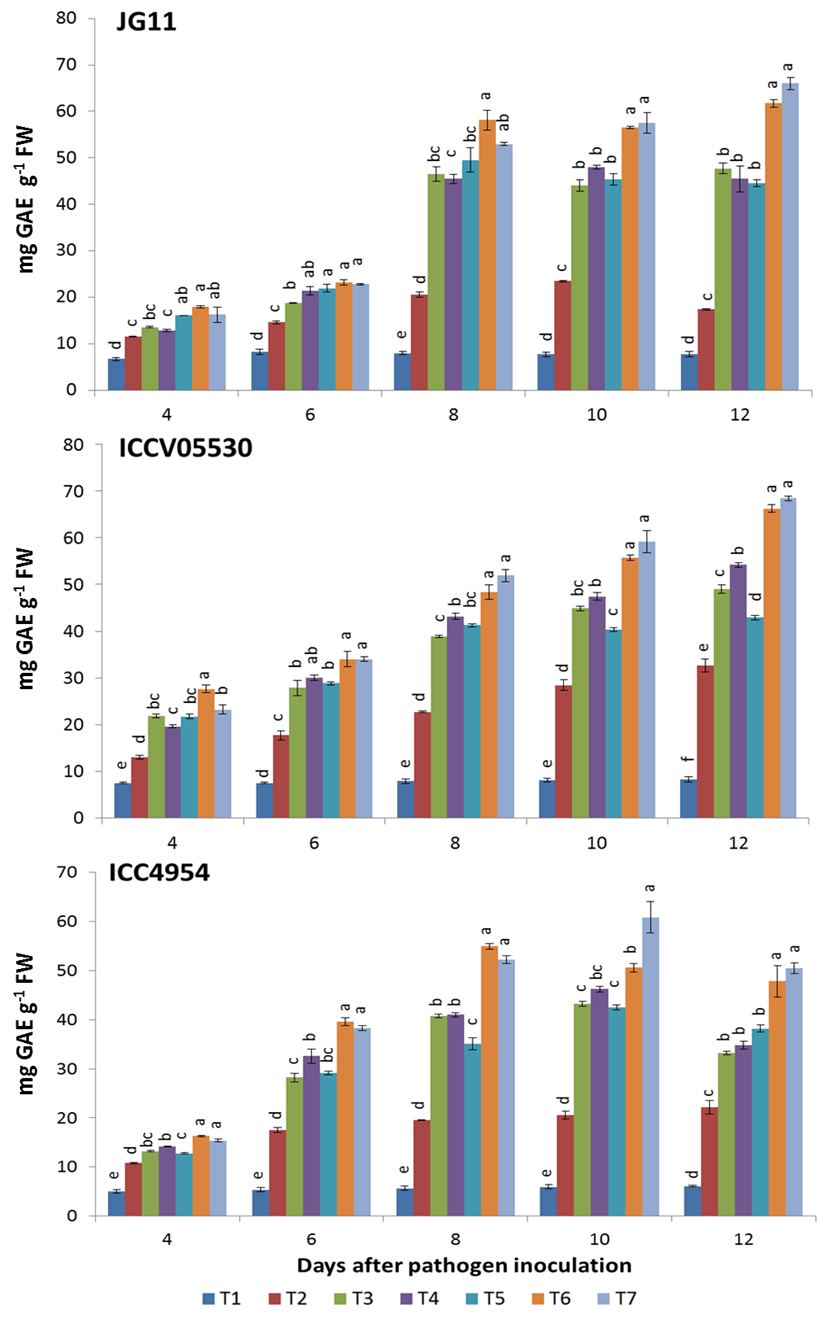
**

Each bar indicates mean (n=3). Error bar indicates SE. Lower case letters above the bars indicate significant differences among the treatments at specified DAPI as per Tukey’s test (*p*≤0.05).

**Supplementary Figure 13.** Principal component analysis on evaluation of all the studied antioxidant parameters in chickpea JG11 (i), ICCV05530 (ii) and ICC4954 (iii) during anti-*B. cinerea* study

**i**

**ii**

4, 6, 8, 10 and 12 indicates sampling time.

**iii**

4, 6, 8, 10 and 12 indicates sampling period. T1- Control; T2 - Disease Control challenged with *B. cinerea*; T3 - *Streptomyces* sp. ATIRS43 treated; T4 - *Streptomyces* sp. ATIRS65 treated; T5 -*Streptomyces* sp. ARRS10 treated; T6 - Consortium of ATIRS43+ATIRS65+ARRS10 treated; T7 – *T. harzianum* treated.
